# Supplementary material for: Seroprevalence of immunoglobulin M and G antibodies against SARS-CoV-2 in China
Source: Springer Nature journal article supplement (doi:10.1038/s41591-020-0949-6), 2020-06-05
Supplement: 41591_2020_949_MOESM1_ESM.pdf [file 41591_2020_949_MOESM1_ESM.pdf]

## Reporting Summary

Nature Research wishes to improve the reproducibility of the work that we publish. This form provides structure for consistency and transparency in reporting. For further information on Nature Research policies, see our [Editorial Policies](#) and the [Editorial Policy Checklist](#).

### Statistics

For all statistical analyses, confirm that the following items are present in the figure legend, table legend, main text, or Methods section.

n/a Confirmed

- The exact sample size ( $n$ ) for each experimental group/condition, given as a discrete number and unit of measurement
- A statement on whether measurements were taken from distinct samples or whether the same sample was measured repeatedly
- The statistical test(s) used AND whether they are one- or two-sided  
*Only common tests should be described solely by name; describe more complex techniques in the Methods section.*
- A description of all covariates tested
- A description of any assumptions or corrections, such as tests of normality and adjustment for multiple comparisons
- A full description of the statistical parameters including central tendency (e.g. means) or other basic estimates (e.g. regression coefficient) AND variation (e.g. standard deviation) or associated estimates of uncertainty (e.g. confidence intervals)
- For null hypothesis testing, the test statistic (e.g.  $F$ ,  $t$ ,  $r$ ) with confidence intervals, effect sizes, degrees of freedom and  $P$  value noted  
*Give  $P$  values as exact values whenever suitable.*
- For Bayesian analysis, information on the choice of priors and Markov chain Monte Carlo settings
- For hierarchical and complex designs, identification of the appropriate level for tests and full reporting of outcomes
- Estimates of effect sizes (e.g. Cohen's  $d$ , Pearson's  $r$ ), indicating how they were calculated

*Our web collection on [statistics for biologists](#) contains articles on many of the points above.*

### Software and code

Policy information about [availability of computer code](#)

Data collection Ms Excel 2013, version 15.0

Data analysis R (version 3.5.3)

For manuscripts utilizing custom algorithms or software that are central to the research but not yet described in published literature, software must be made available to editors and reviewers. We strongly encourage code deposition in a community repository (e.g. GitHub). See the Nature Research [guidelines for submitting code & software](#) for further information.

### Data

Policy information about [availability of data](#)

All manuscripts must include a [data availability statement](#). This statement should provide the following information, where applicable:

- Accession codes, unique identifiers, or web links for publicly available datasets
- A list of figures that have associated raw data
- A description of any restrictions on data availability

The data access committee comprises three corresponding authors and there is no restriction to data access. De-identified individual level-data are available upon request to Dr. Hou at [ffhouguangzhou@163.com](mailto:ffhouguangzhou@163.com)

## Field-specific reporting

Please select the one below that is the best fit for your research. If you are not sure, read the appropriate sections before making your selection.

Life sciences       Behavioural & social sciences       Ecological, evolutionary & environmental sciences

For a reference copy of the document with all sections, see [nature.com/documents/nr-reporting-summary-flat.pdf](https://www.nature.com/documents/nr-reporting-summary-flat.pdf)

## Life sciences study design

All studies must disclose on these points even when the disclosure is negative.

|                 |                                                                                                                                                                                    |
|-----------------|------------------------------------------------------------------------------------------------------------------------------------------------------------------------------------|
| Sample size     | <input type="text" value="No sample size calculation was performed. We included all available data in the analysis."/>                                                             |
| Data exclusions | <input type="text" value="None subject was excluded"/>                                                                                                                             |
| Replication     | <input type="text" value="none"/>                                                                                                                                                  |
| Randomization   | <input type="text" value="Our study is an observation study, no randomization is needed."/>                                                                                        |
| Blinding        | <input type="text" value="Antibody detection were performed independently by researchers blind to samples information. Data analysis were performed by two trained researchers."/> |

## Reporting for specific materials, systems and methods

We require information from authors about some types of materials, experimental systems and methods used in many studies. Here, indicate whether each material, system or method listed is relevant to your study. If you are not sure if a list item applies to your research, read the appropriate section before selecting a response.

### Materials & experimental systems

### Methods

| n/a                                 | Involved in the study                                           | n/a                                 | Involved in the study                           |
|-------------------------------------|-----------------------------------------------------------------|-------------------------------------|-------------------------------------------------|
| <input checked="" type="checkbox"/> | <input type="checkbox"/> Antibodies                             | <input checked="" type="checkbox"/> | <input type="checkbox"/> ChIP-seq               |
| <input checked="" type="checkbox"/> | <input type="checkbox"/> Eukaryotic cell lines                  | <input checked="" type="checkbox"/> | <input type="checkbox"/> Flow cytometry         |
| <input checked="" type="checkbox"/> | <input type="checkbox"/> Palaeontology and archaeology          | <input checked="" type="checkbox"/> | <input type="checkbox"/> MRI-based neuroimaging |
| <input checked="" type="checkbox"/> | <input type="checkbox"/> Animals and other organisms            |                                     |                                                 |
| <input type="checkbox"/>            | <input checked="" type="checkbox"/> Human research participants |                                     |                                                 |
| <input type="checkbox"/>            | <input checked="" type="checkbox"/> Clinical data               |                                     |                                                 |
| <input checked="" type="checkbox"/> | <input type="checkbox"/> Dual use research of concern           |                                     |                                                 |

## Human research participants

Policy information about [studies involving human research participants](#)

|                            |                                                                                                                                                                                                                                                                                                                                                                                                                    |
|----------------------------|--------------------------------------------------------------------------------------------------------------------------------------------------------------------------------------------------------------------------------------------------------------------------------------------------------------------------------------------------------------------------------------------------------------------|
| Population characteristics | <input type="text" value="A total of 17,368 subjects, including 2535 patients, 4384 healthcare workers, 219 family members of healthcare workers, 346 staff members from hotels designed for accommodation of healthcare workers who were responsible for COVID-19 management, 442 factory workers, and 9442 residents in a community were enrolled. Of whom, 43.5% were males and the median age was 48 years."/> |
| Recruitment                | <input type="text" value="Healthcare workers, family members, outpatients and community residents were recruited on voluntary participation by a public call. Hemodialysis patients, hotel staffs and factory workers were required to take the serological test at the participant centers following the implementation of regulation for COVID-19 surveillance these population during the epidemic in China."/> |
| Ethics oversight           | <input type="text" value="The Medical Ethics Committees of the Nanfang Hospital, Sichuan Provincial People's Hospital, and Chongqing Medical University approved this study and all patients/subjects signed a consent form."/>                                                                                                                                                                                    |

Note that full information on the approval of the study protocol must also be provided in the manuscript.

## Clinical data

Policy information about [clinical studies](#)

All manuscripts should comply with the ICMJE [guidelines for publication of clinical research](#) and a completed [CONSORT checklist](#) must be included with all submissions.

|                             |                                                           |
|-----------------------------|-----------------------------------------------------------|
| Clinical trial registration | <input type="text" value="This is not a clinical trial"/> |
|-----------------------------|-----------------------------------------------------------|

Study protocol

To estimate the cumulative prevalence of SARS-CoV-2 infection in China, we conducted the serological survey to evaluate the host serologic response, measured by the levels of immunoglobulins M and G in 17,368 individuals, in the city of Wuhan, the epicenter of the COVID-19 pandemic in China, and geographic regions in the country, during the period from March 9, 2020 to April 10, 2020.

Data collection

Demographic data, including age, gender, residential region, and occupation of each participant, was collected

Outcomes

RT-PCR testing results for SARS-CoV-2 RNA and serological testing results for antibodies against a recombinant antigen of SARS-CoV-2.
